# Supplementary material for: Construction of coordination polymers based on methylenebis(3,5-dimethylpyrazole) and varied aromatic carboxylic acids
Source: Royal Society of Chemistry journal article supplement (doi:10.1039/c3ce41575a), 2013-01-01
Supplement: c3ce41575a.pdf [file c3ce41575a.pdf]

**Construction of Coordination Polymers based on  
Methylenebis(3,5-dimethylpyrazole) and Varied Aromatic  
Carboxylic Acids**

*Xiang-Guang Guo, Wen-Bin Yang, Xiao-Yuan Wu, Qi-Kai Zhang, and Can-Zhong Lu\**

*State Key Laboratory of Structural Chemistry, Fujian Institute of Research on the  
Structure of Matter, Chinese Academy of Sciences, Fuzhou, Fujian 35002, China.*

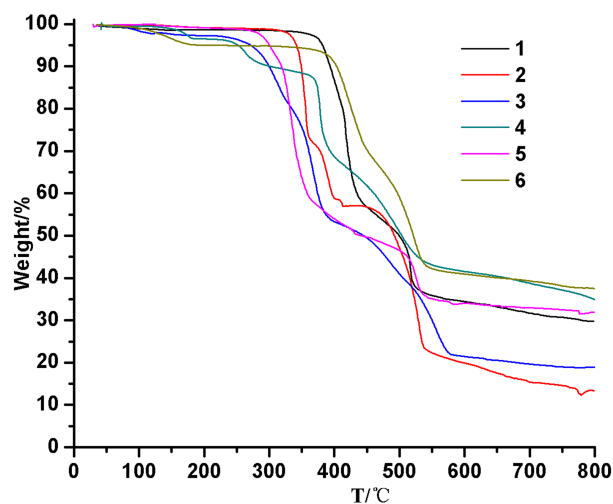

Fig. S1. TGA curves for complexes 1-6.

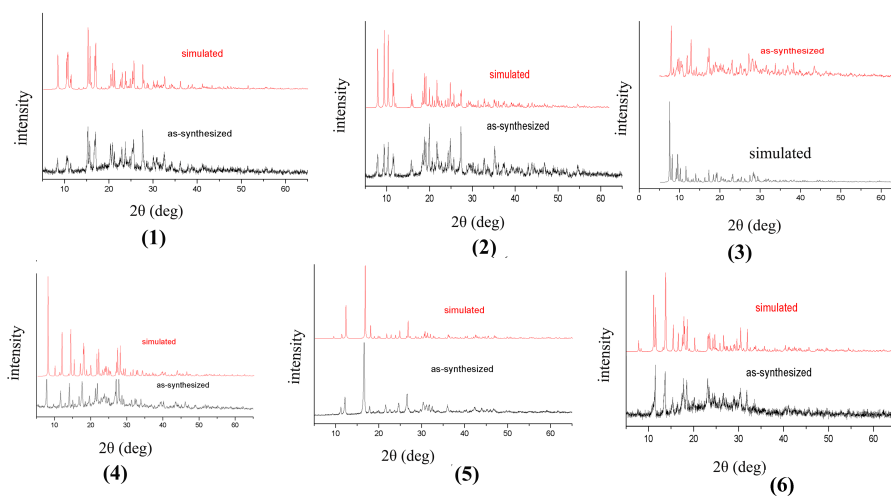

Fig. S2. PXRD patterns of complexes 1-6.

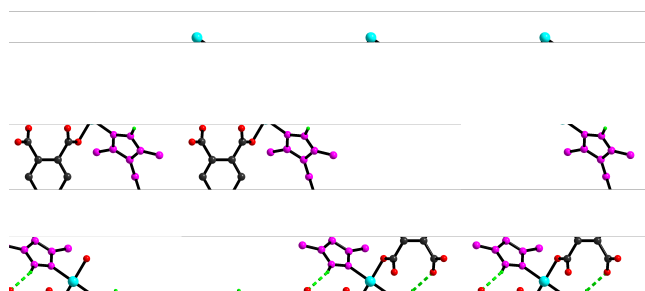

Fig. S3. Perspective view of a selected (4, 4) single layer in 5. The H<sub>2</sub>MDP ligands and Cu(II) ions on another single layer are omitted for the clarity.

**Table S1.** Selected Bond Lengths (Å) and Bond Angles (°) for **1**

| Bond              | Dist       | Bond              | Dist       |
|-------------------|------------|-------------------|------------|
| Co(1)-O(4)        | 1.925(3)   | Co(1)-N(4)#1      | 1.992(3)   |
| Co(1)-O(1)        | 1.930(3)   | Co(1)-N(3)        | 2.004(3)   |
| Angle             | (°)        | Angle             | (°)        |
| O(4)-Co(1)-O(1)   | 99.57(16)  | O(1)-Co(1)-N(3)   | 114.84(14) |
| O(4)-Co(1)-N(4)#1 | 111.21(13) | N(4)#1-Co(1)-N(3) | 106.54(13) |
| O(1)-Co(1)-N(4)#1 | 116.31(14) | C(1)-N(4)-Co(1)#2 | 134.0(3)   |
| O(4)-Co(1)-N(3)   | 108.06(14) | N(1)-N(4)-Co(1)#2 | 120.0(2)   |

Symmetry codes: #1)  $-x+3/2, y+1/2, -z+1/2$ ; #2)  $-x+3/2, y-1/2, -z+1/2$ .

**Table S2.** Selected Bond Lengths (Å) and Bond Angles (°) for **2**

| Bond              | Dist     | Bond              | Dist     |
|-------------------|----------|-------------------|----------|
| Cd(1)-O(3)        | 2.186(5) | Cd(1)-O(2)        | 2.375(7) |
| Cd(1)-N(4)        | 2.286(7) | Cd(1)-O(1)        | 2.384(8) |
| Cd(1)-N(3)#1      | 2.288(7) |                   |          |
| Angle             | (°)      | Angle             | (°)      |
| O(3)-Cd(1)-N(4)   | 137.0(3) | N(4)-Cd(1)-O(2)   | 90.4(3)  |
| O(3)-Cd(1)-N(3)#1 | 98.9(2)  | N(3)#1-Cd(1)-O(2) | 143.0(3) |
| N(4)-Cd(1)-N(3)#1 | 99.3(2)  | O(3)-Cd(1)-O(1)   | 98.9(3)  |
| O(3)-Cd(1)-O(2)   | 97.8(3)  | N(4)-Cd(1)-O(1)   | 119.3(3) |
| N(3)#1-Cd(1)-O(1) | 90.8(2)  | O(2)-Cd(1)-O(1)   | 54.0(3)  |

Symmetry codes: #1)  $-x+1, -y, -z$ .

**Table S3.** Selected Bond Lengths (Å) and Bond Angles (°) for **3**

| Bond                | Dist       | Bond                | Dist      |
|---------------------|------------|---------------------|-----------|
| Cd(1)-O(3)#1        | 2.314(3)   | Cd(2)-N(4)          | 2.318(3)  |
| Cd(1)-O(3)          | 2.314(3)   | Cd(2)-N(4)#4        | 2.318(3)  |
| Cd(1)-N(7)#2        | 2.345(3)   | Cd(2)-N(3)#3        | 2.340(3)  |
| Cd(1)-N(7)#3        | 2.345(3)   | Cd(2)-N(3)#5        | 2.340(3)  |
| Cd(1)-N(5)          | 2.405(3)   | Cd(2)-O(4)#4        | 2.405(3)  |
| Cd(1)-N(5)#1        | 2.405(3)   | Cd(2)-O(4)          | 2.405(3)  |
| Angle               | (°)        | Angle               | (°)       |
| O(3)#1-Cd(1)-O(3)   | 168.19(14) | O(3)-Cd(1)-N(5)#1   | 87.73(11) |
| O(3)#1-Cd(1)-N(7)#2 | 94.82(12)  | N(7)#2-Cd(1)-N(5)#1 | 88.18(12) |
| O(3)-Cd(1)-N(7)#2   | 93.67(11)  | N(7)#3-Cd(1)-N(5)#1 | 75.47(12) |
| O(3)#1-Cd(1)-N(7)#3 | 93.67(11)  | N(5)-Cd(1)-N(5)#1   | 95.81(16) |
| O(3)-Cd(1)-N(7)#3   | 94.82(12)  | N(4)-Cd(2)-N(4)#4   | 87.91(16) |

|                     |            |                     |            |
|---------------------|------------|---------------------|------------|
| N(7)#2-Cd(1)-N(7)#3 | 87.92(16)  | N(4)-Cd(2)-N(3)#3   | 95.70(12)  |
| O(3)#1-Cd(1)-N(5)   | 87.73(11)  | N(4)#4-Cd(2)-N(3)#3 | 66.72(12)  |
| O(3)-Cd(1)-N(5)     | 84.36(11)  | N(4)-Cd(2)-N(3)#5   | 66.72(12)  |
| N(7)#2-Cd(1)-N(5)   | 175.47(12) | N(4)#4-Cd(2)-N(3)#5 | 95.70(12)  |
| N(7)#3-Cd(1)-N(5)   | 88.18(12)  | N(3)#3-Cd(2)-N(3)#5 | 83.68(17)  |
| O(3)#1-Cd(1)-N(5)#1 | 84.36(11)  | N(4)-Cd(2)-O(4)#4   | 91.39(10)  |
| N(4)#4-Cd(2)-O(4)#4 | 87.03(10)  | N(4)#4-Cd(2)-O(4)   | 91.39(10)  |
| N(3)#3-Cd(2)-O(4)#4 | 80.12(11)  | N(3)#3-Cd(2)-O(4)   | 101.54(11) |
| N(3)#5-Cd(2)-O(4)#4 | 101.54(11) | N(3)#5-Cd(2)-O(4)   | 80.12(11)  |
| N(4)-Cd(2)-O(4)     | 87.03(10)  | O(4)#4-Cd(2)-O(4)   | 177.81(13) |

Symmetry codes: #1)  $-x+1, y, -z+1/2$ ; #2)  $-x+1, y-1, -z+1/2$ ;  
 #3)  $x, y-1, z$ ; #4)  $-x+2, -y, z+1/2$ ; #5)  $-x+2, y-1, -z+1/2$ .

**Table S4.** Selected Bond Lengths (Å) and Bond Angles (°) for **4**

| Bond                | Dist      | Bond               | Dist      |
|---------------------|-----------|--------------------|-----------|
| Mn(1)-O(6)#1        | 2.132(2)  | Mn(1)-O(1)         | 2.226(2)  |
| Mn(1)-N(2)          | 2.207(2)  | Mn(1)-O(1W)        | 2.273(2)  |
| Mn(1)-N(4)#2        | 2.213(2)  | Mn(1)-O(2)         | 2.343(2)  |
| Angle               | (°)       | Angle              | (°)       |
| O(6)#1-Mn(1)-N(2)   | 113.35(9) | N(4)#2-Mn(1)-O(1W) | 176.41(9) |
| O(6)#1-Mn(1)-N(4)#2 | 87.48(9)  | O(1)-Mn(1)-O(1W)   | 84.62(8)  |
| N(2)-Mn(1)-N(4)#2   | 92.42(9)  | O(6)#1-Mn(1)-O(2)  | 145.54(8) |
| O(6)#1-Mn(1)-O(1)   | 88.03(8)  | N(2)-Mn(1)-O(2)    | 100.49(8) |
| N(2)-Mn(1)-O(1)     | 156.44(8) | N(4)#2-Mn(1)-O(2)  | 97.76(9)  |
| N(4)#2-Mn(1)-O(1)   | 98.55(9)  | O(1)-Mn(1)-O(2)    | 57.52(7)  |
| O(6)#1-Mn(1)-O(1W)  | 90.96(8)  | O(1W)-Mn(1)-O(2)   | 85.35(7)  |
| N(2)-Mn(1)-O(1W)    | 85.22(8)  |                    |           |

Symmetry codes: #1  $x+1/2, -y+1/2, z+1/2$ ; #2  $-x+1, -y+1, -z$ .

**Table S5.** Selected Bond Lengths (Å) and Bond Angles (°) for **5**

| Bond              | Dist       | Bond                | Dist       |
|-------------------|------------|---------------------|------------|
| Cu(1)-O(2)#1      | 1.9208(18) | Cu(1)-N(1)          | 2.024(2)   |
| Cu(1)-O(2)        | 1.9208(18) | Cu(1)-N(1)#1        | 2.024(2)   |
| Angle             | (°)        | Angle               | (°)        |
| O(2)#1-Cu(1)-O(2) | 158.09(12) | O(2)#1-Cu(1)-N(1)#1 | 97.63(8)   |
| O(2)#1-Cu(1)-N(1) | 89.26(8)   | O(2)-Cu(1)-N(1)#1   | 89.26(8)   |
| O(2)-Cu(1)-N(1)   | 97.63(8)   | N(1)-Cu(1)-N(1)#1   | 143.25(12) |

Symmetry code: #1)  $-x+3/4, -y+3/4, z$ .

**Table S6.** Selected Bond Lengths (Å) and Bond Angles (°) for **6**

| Bond         | Dist     | Bond         | Dist     |
|--------------|----------|--------------|----------|
| Co(1)-O(4)#1 | 1.921(2) | Co(1)-N(4)#2 | 2.017(3) |
| Co(1)-O(3)   | 1.999(2) | Co(1)-N(2)   | 2.044(2) |

| Angle                                                                                                     | (°)         | Angle             | (°)        |
|-----------------------------------------------------------------------------------------------------------|-------------|-------------------|------------|
| O(4)#1-Co(1)-O(3)                                                                                         | 118.00(10)  | O(4)#1-Co(1)-N(2) | 94.26(9)   |
| O(4)#1-Co(1)-N(4)#2                                                                                       | 121.34(10)  | O(3)-Co(1)-N(2)   | 106.56(9)  |
| O(3)-Co(1)-N(4)#2                                                                                         | 107.81(10)  | N(4)#2-Co(1)-N(2) | 106.17(10) |
| Symmetry codes: #1) $x, y+1, z$ ; #2) $-x+2, y, -z+5/2$ .                                                 |             |                   |            |
| D-H/A                                                                                                     | d(H...A)/ Å | D(D...A)/ Å       | ∠DHA/      |
| For complex <b>1</b>                                                                                      |             |                   |            |
| O1W-H1WA...O2                                                                                             | 2.02        | 2.863(9)          | 175        |
| N1-H1A...O3#1                                                                                             | 1.94        | 2.730(5)          | 152        |
| O1W-H1WB...O2#2                                                                                           | 2.02        | 2.863(9)          | 175        |
| N2-H2A...O2                                                                                               | 2.16        | 2.873(7)          | 140        |
| Symmetry transformations to generate equivalent atoms: #1) $3/2-x, -1/2+y, 1/2-z$ ; #2) $1-x, y, 1/2-z$ . |             |                   |            |

**Table S7. Hydrogen bond distance and angle data for 1.**

**Table S8. Hydrogen bond distance and angle data for 2**

| D-H/A                                                                                              | d(H...A)/ Å | D(D...A)/ Å | ∠DHA/ |
|----------------------------------------------------------------------------------------------------|-------------|-------------|-------|
| For complex <b>2</b>                                                                               |             |             |       |
| N2-H2A...O4#1                                                                                      | 2.01        | 2.761(9)    | 145.6 |
| N1-H1A...O3#2                                                                                      | 2.07        | 2.882(9)    | 156.8 |
| Symmetry transformations to generate equivalent atoms: #1) $-x, -y, -z+1$ ; #2) $-x-1, -y, -z+2$ . |             |             |       |

**Table S9. Hydrogen bond distance and angle data for 3**

| D-H/A                                                                                                                          | H...A   | D...A    | <(DHA) |
|--------------------------------------------------------------------------------------------------------------------------------|---------|----------|--------|
| For complex <b>3</b>                                                                                                           |         |          |        |
| O5-H5D...O1W                                                                                                                   | 1.83    | 2.651(5) | 174.8  |
| N1-H1D...O2                                                                                                                    | 1.93    | 2.749(4) | 159.9  |
| N8-H8C...O1#1                                                                                                                  | 1.89    | 2.742(4) | 173.1  |
| N6-H6A...O1#2                                                                                                                  | 2.23    | 3.007(4) | 149.9  |
| O1W-H1W...O2#3                                                                                                                 | 1.82(7) | 2.766(5) | 170(5) |
| Symmetry transformations to generate equivalent atoms: #1) $-x+1, y+1, -z+1/2$ ; #2) $x, -y+1, z+1/2$ ; #3) $x, -y+1, z-1/2$ . |         |          |        |

**Table S10. Hydrogen bond distance and angle data for 5**

| D-H/A                                                                            | H...A | D...A    | <(DHA) |
|----------------------------------------------------------------------------------|-------|----------|--------|
| For complex <b>5</b>                                                             |       |          |        |
| N2-H2D...O1#1                                                                    | 2.05  | 2.815(3) | 147.1  |
| Symmetry transformations to generate equivalent atoms: #1) $-x+5/4, y, -z+5/4$ . |       |          |        |

**Table S11.** Hydrogen bond distance and angle data for **6**

| D-H/A                                                                                          | H...A | D...A    | <(DHA) |
|------------------------------------------------------------------------------------------------|-------|----------|--------|
| For complex <b>6</b>                                                                           |       |          |        |
| O1W-H1WD...O3                                                                                  | 1.97  | 2.789(3) | 161.5  |
| N1-H1A...O1W#1                                                                                 | 2.11  | 2.928(4) | 159.0  |
| N3-H3A...O2#2                                                                                  | 2.04  | 2.867(3) | 162.1  |
| Symmetry transformations to generate equivalent atoms: #1) $x, y+1, z$ ; #2) $-x, y, -z+1/2$ . |       |          |        |
